# Supplementary material for: First Insights on Early Host Plants and Dispersal Behavior of Halyomorpha halys (Hemiptera: Pentatomidae) from Overwintering to Crop Colonization
Source: PubMed Central journal article supplement (PMC7762184; doi:10.3390/insects11120866), 2020-12-06
Supplement: insects-11-00866-s001.pdf [file insects-11-00866-s001.pdf]

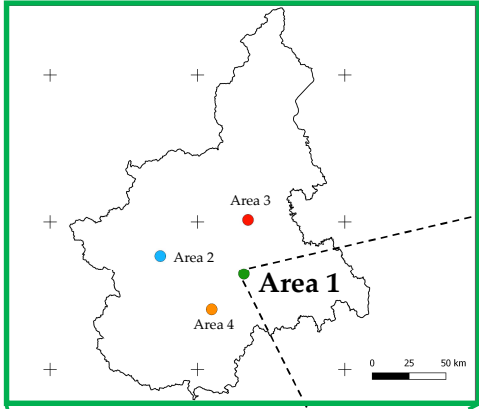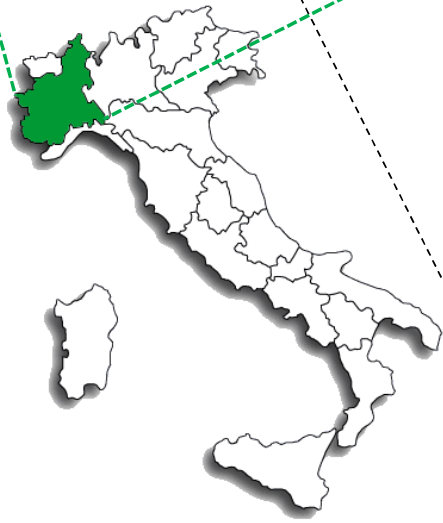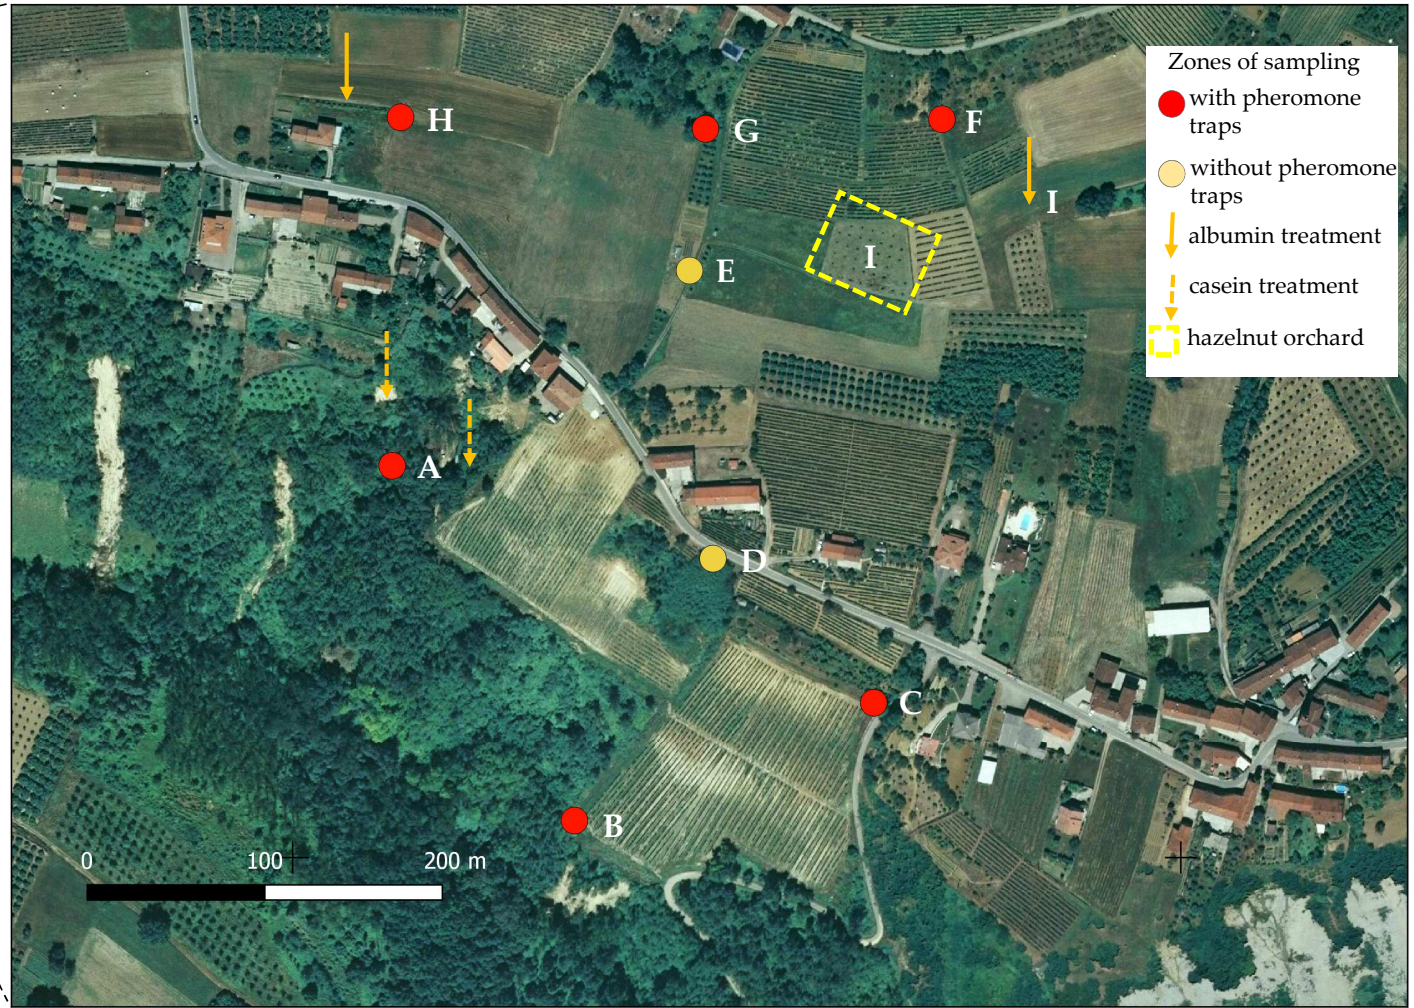

- Zones of sampling
- with pheromone traps
  - without pheromone traps
  - ↓ albumin treatment
  - ↓ casein treatment
  - hazelnut orchard

431500

432000

4964500

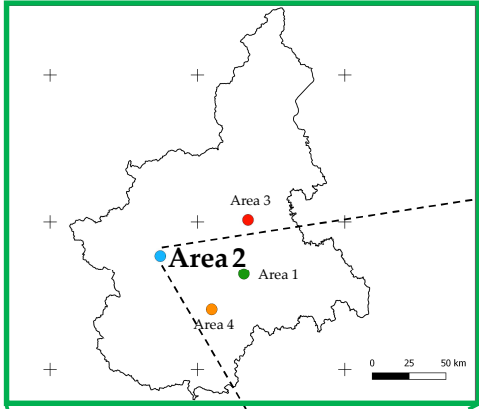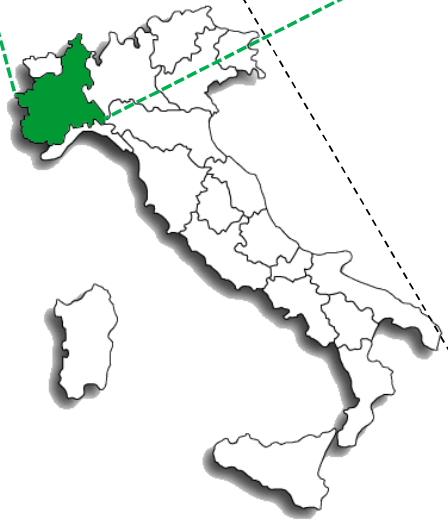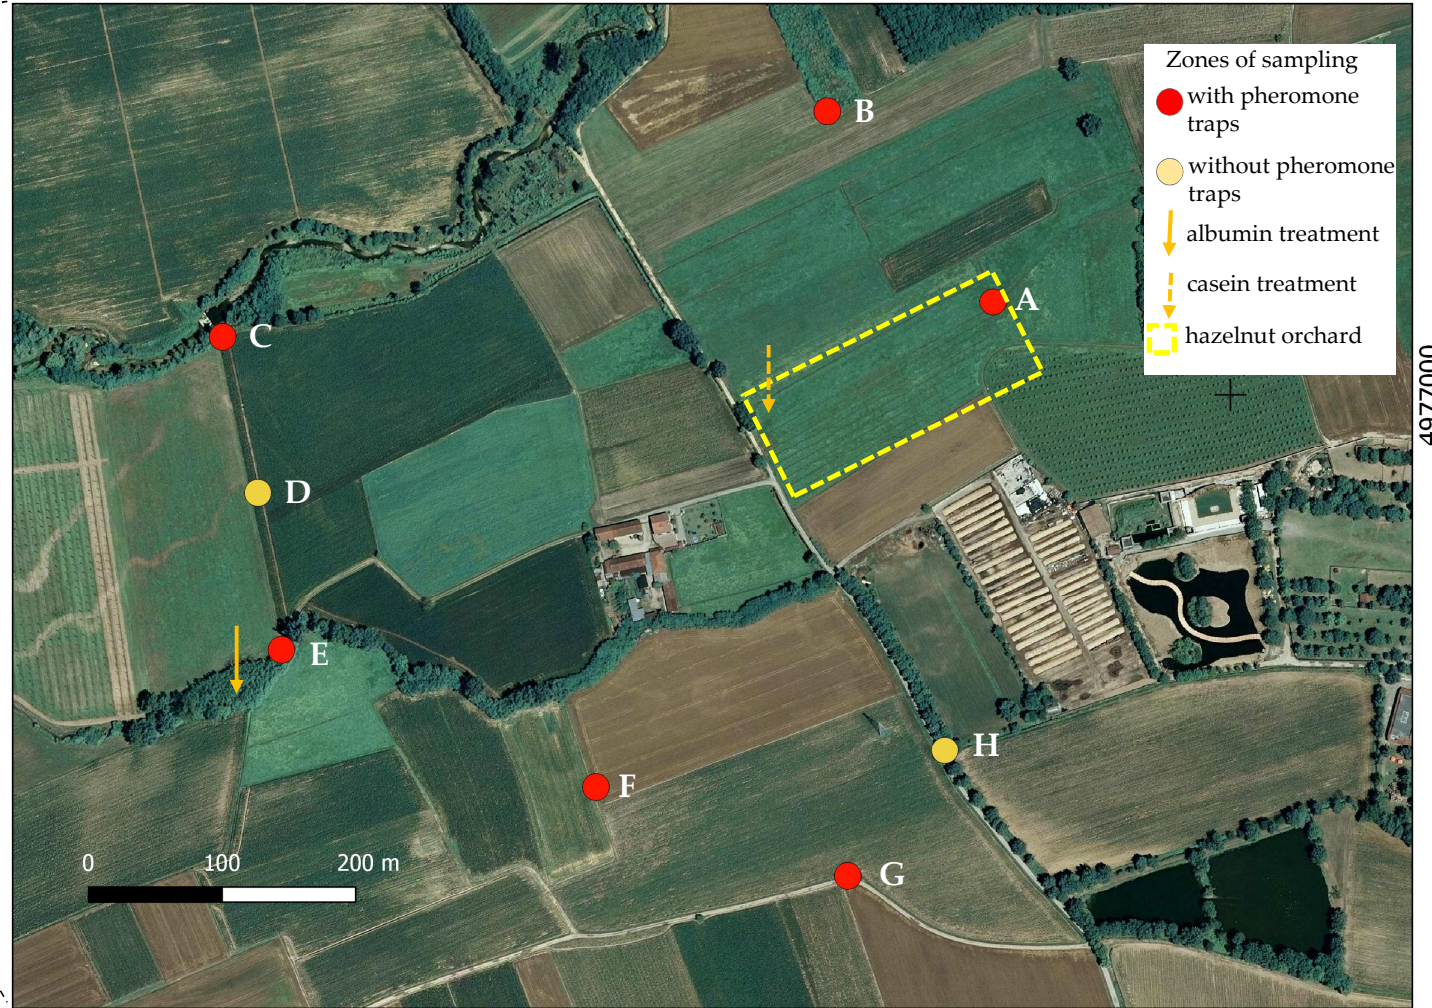

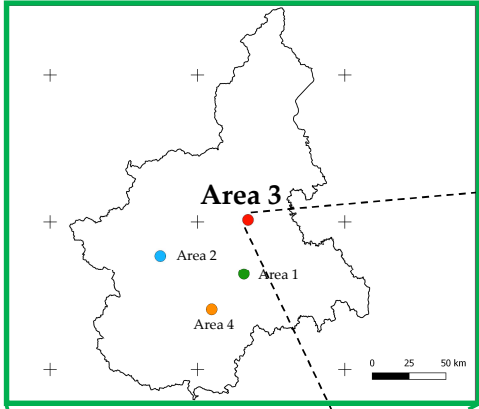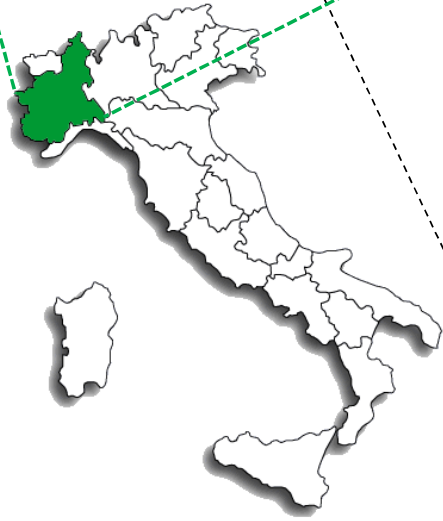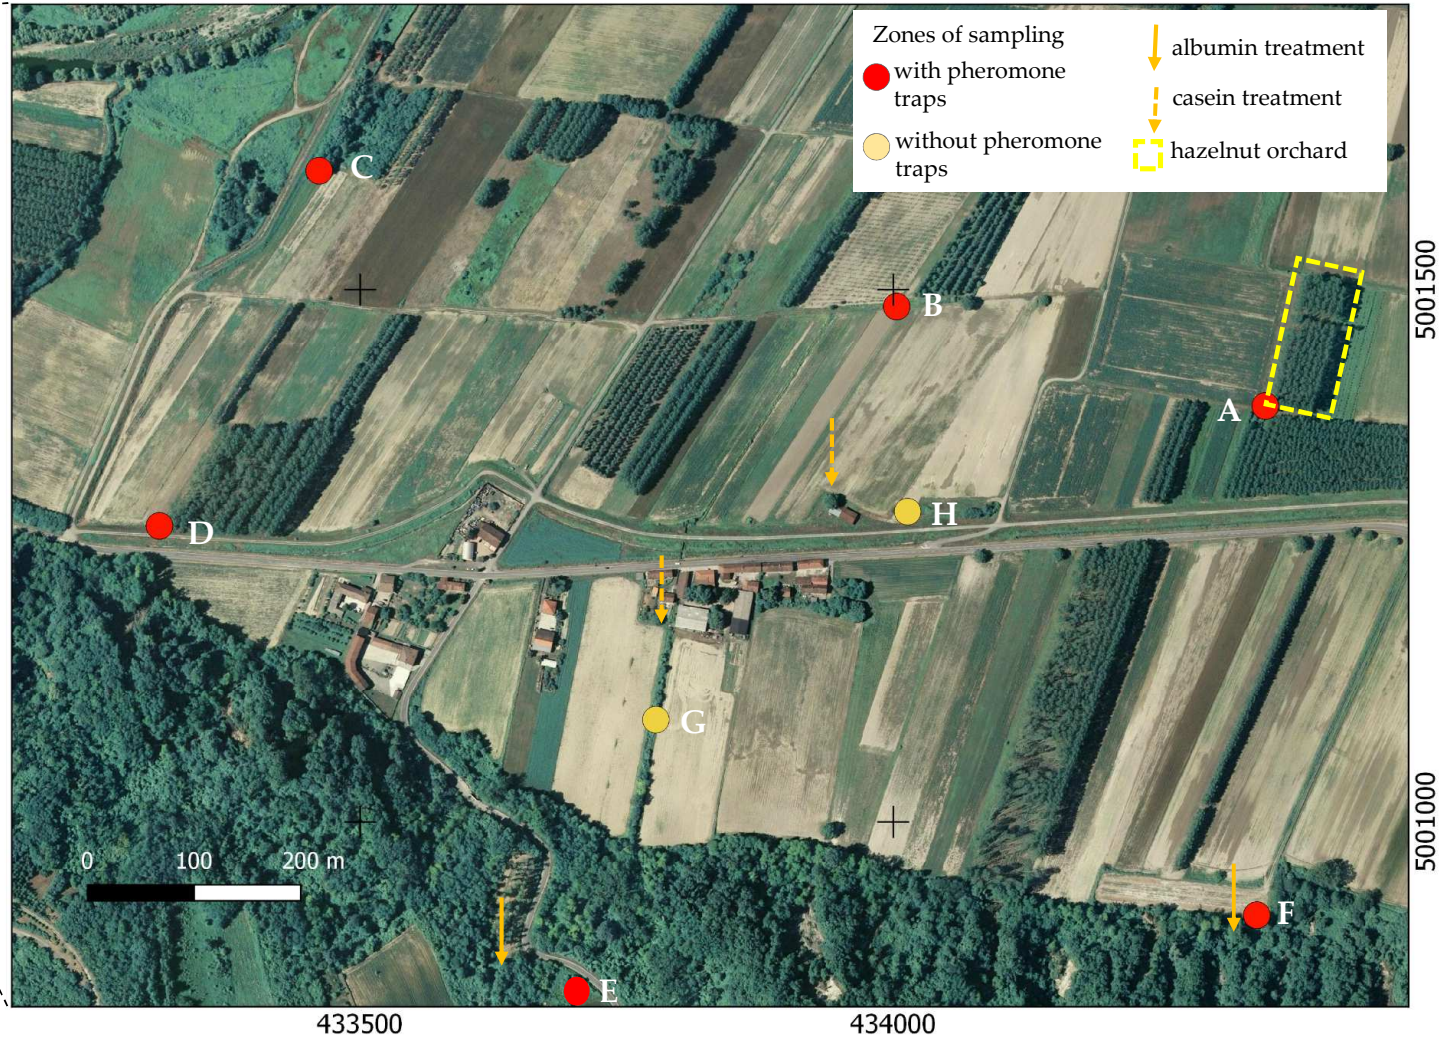

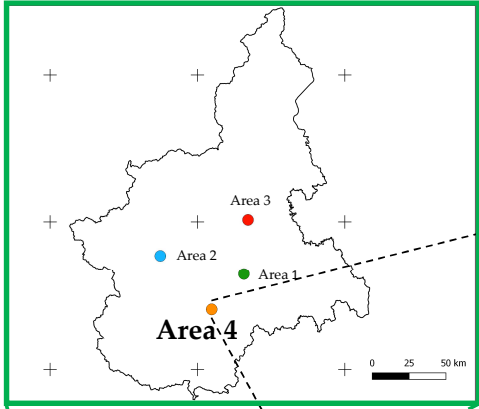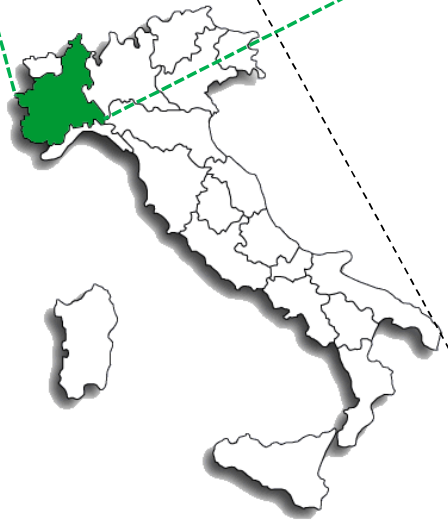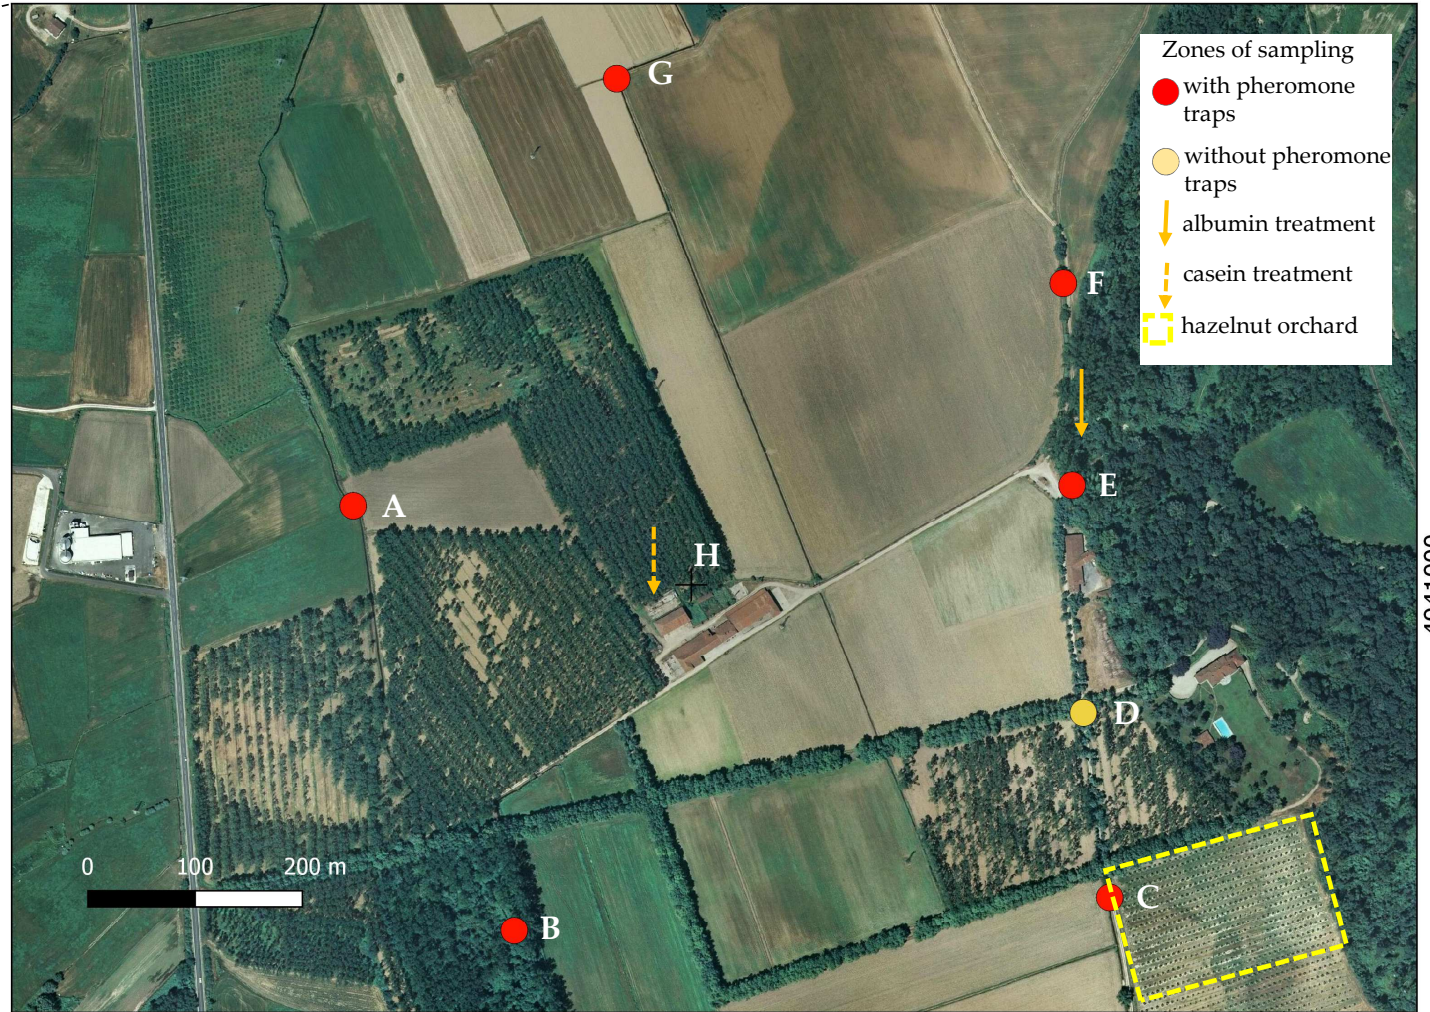

- Zones of sampling
- with pheromone traps
  - without pheromone traps
  - ↓ albumin treatment
  - - - casein treatment
  - ▭ hazelnut orchard
